# Supplementary figures and images for: Trap and track: designing self-reporting porous Si photonic crystals for rapid bacteria detection
Source: Royal Society of Chemistry journal article supplement (doi:10.1039/c4an00364k), 2014-01-01

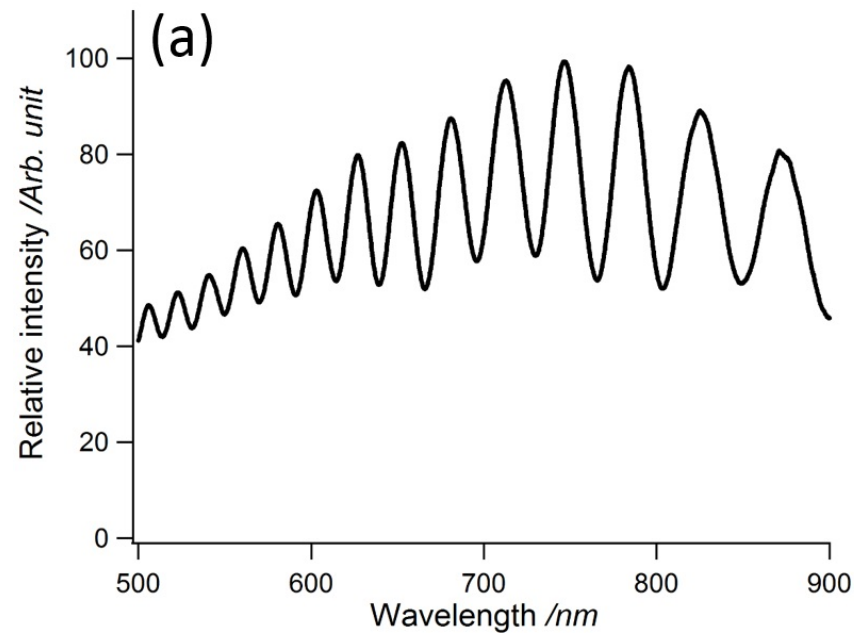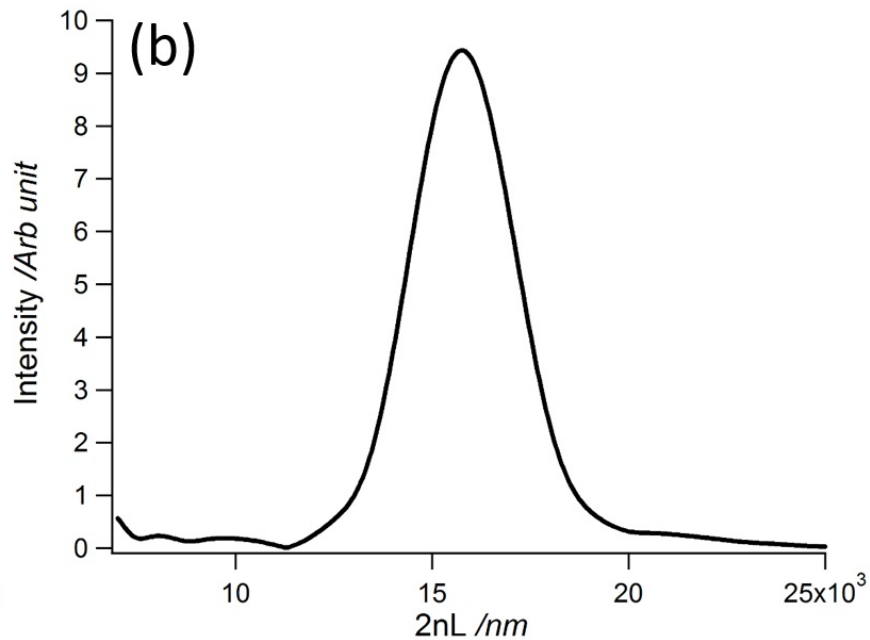

Supplement: c4an00364k2.pdf [file c4an00364k2.pdf]
